# Supplementary material
Source: MDPI journal article supplement (https://www.mdpi.com/2075-163X/13/11/1461)
Supplement: s1 [file s1]

# Supplementary Materials: An Improved Understanding of Chalcopyrite Leaching Mechanisms: The Influence of Anisotropic Crystal Planes

Zhenlun Wei <sup>1</sup>, Xu Yang <sup>1</sup>, Wanqing Li <sup>1</sup>, Qiang Ma <sup>1</sup>, Xiaoyong Wu <sup>1</sup> and Yubiao Li <sup>1,2</sup>

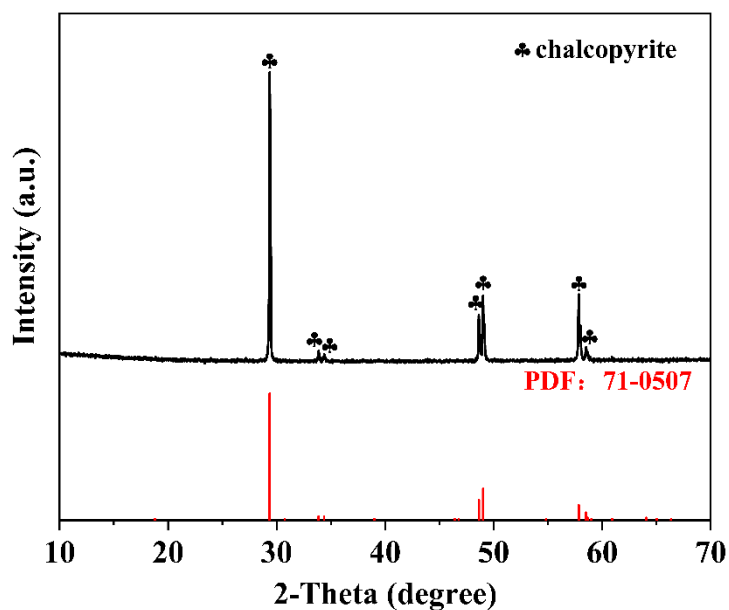

**Figure S1.** XRD patterns of raw CuFeS<sub>2</sub> sample (D8 Advance, Bruker, Germany). The PDF: 71-0507 was the standard XRD pattern of CuFeS<sub>2</sub> from Jade 6.0. It was clearly that the diffraction peaks of raw chalcopyrite sample were highly consistent with the standard CuFeS<sub>2</sub> XRD pattern (PDF: 71-0507), indicating that the raw CuFeS<sub>2</sub> sample in this study was highly purified.

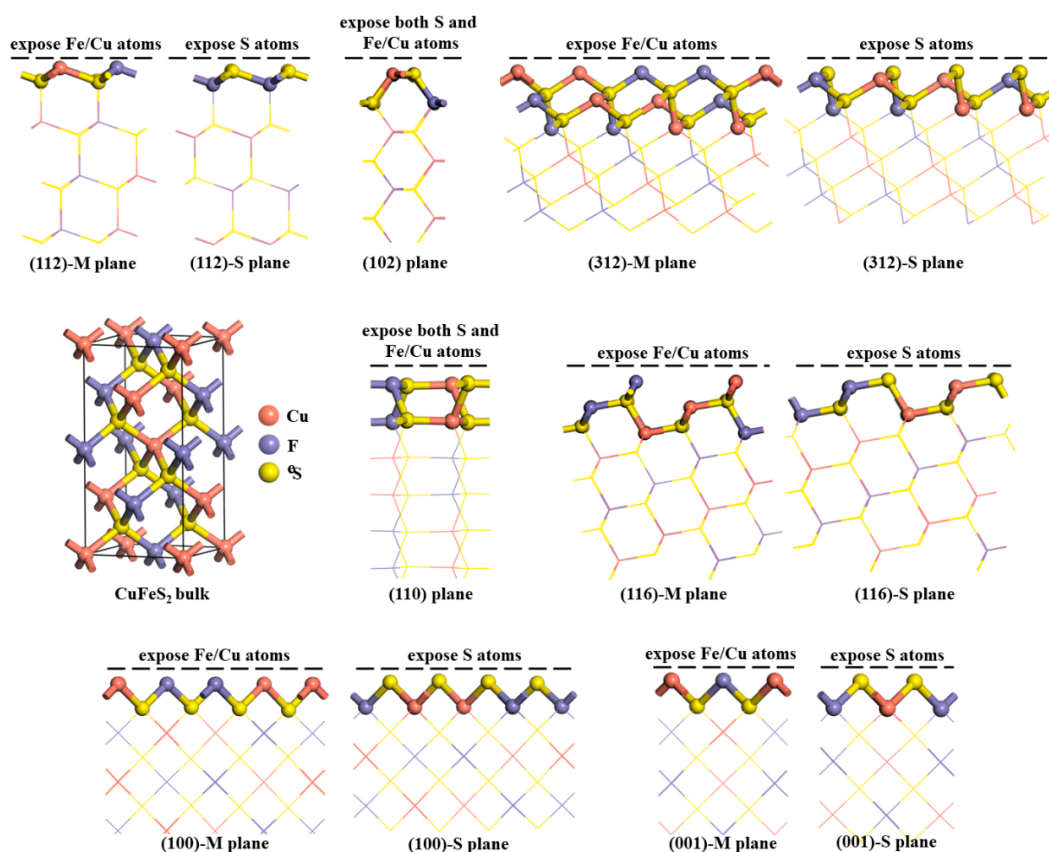

Figure S2. Structure and exposed atoms of  $\text{CuFeS}_2$  planes.

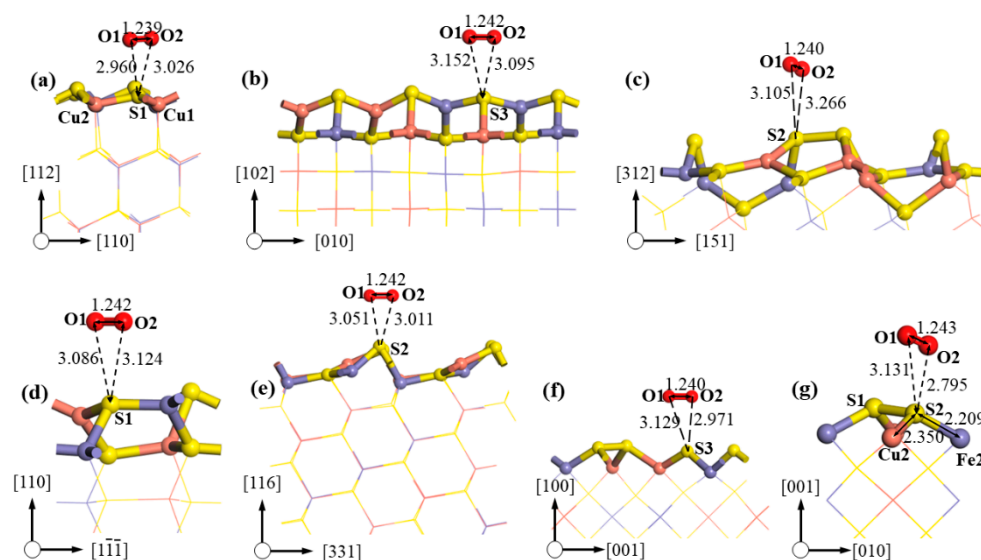

Figure S3. Layout of the adsorption of  $\text{O}_2$  at S sites  $\text{CuFeS}_2$  planes: (a) (112)-S plane; (b) (102) plane; (c) (312)-S plane; (d) (110) plane; (e) (116)-S plane; (f) (100)-S plane; (g) (001)-S plane, distances are in Å.

Table S1. Main element contents of  $\text{CuFeS}_2$  sample determined by XRF (Zetium, PANalytical, Netherlands) (wt. %).

| Element | Cu    | Fe    | S     | Si   | Al   | Mg   | Ca   | Ignition loss |
|---------|-------|-------|-------|------|------|------|------|---------------|
| Content | 36.41 | 31.32 | 30.21 | 0.43 | 0.08 | 0.16 | 0.03 | 1.34          |

**Table S2.** Normalized percentage of exposed planes for standard and experimental CuFeS<sub>2</sub> particles (%).

| Planes | Standard Value | Experimental Value  |        |        |                      |        |        |
|--------|----------------|---------------------|--------|--------|----------------------|--------|--------|
|        |                | 38–75 $\mu\text{m}$ |        |        | 75–150 $\mu\text{m}$ |        |        |
|        |                | TM                  | RM     | BM     | TM                   | RM     | BM     |
| (112)  | 54.975         | 45.696              | 46.765 | 47.519 | 39.618               | 41.434 | 48.668 |
| (204)  | 17.702         | 16.814              | 16.977 | 17.076 | 16.512               | 24.436 | 14.891 |
| (312)  | 9.841          | 10.535              | 9.568  | 8.828  | 12.841               | 7.872  | 13.583 |
| (220)  | 9.181          | 10.048              | 9.568  | 10.556 | 12.691               | 10.421 | 10.282 |
| (116)  | 4.728          | 6.214               | 6.189  | 6.775  | 7.709                | 7.035  | 5.305  |
| (200)  | 2.419          | 5.683               | 5.871  | 4.828  | 5.862                | 4.689  | 4.064  |
| (001)  | 1.154          | 5.010               | 5.062  | 4.418  | 4.767                | 4.113  | 3.207  |

**Table S3.** Normalized percentage of exposed planes for CuFeS<sub>2</sub> particles between standard value and experimental value (%).

| Planes | 38–75 $\mu\text{m}$ |        |        | 75–150 $\mu\text{m}$ |         |        |
|--------|---------------------|--------|--------|----------------------|---------|--------|
|        | TM                  | RM     | BM     | TM                   | RM      | BM     |
| (112)  | −9.279              | −8.210 | −7.456 | −15.357              | −13.541 | −6.307 |
| (204)  | −0.888              | −0.725 | −0.626 | −1.190               | 6.734   | −2.811 |
| (312)  | 0.694               | −0.273 | −1.013 | 3.000                | −1.969  | 3.742  |
| (220)  | 0.867               | 0.387  | 1.375  | 3.510                | 1.240   | 1.101  |
| (116)  | 1.486               | 1.461  | 2.047  | 2.981                | 2.307   | 0.577  |
| (200)  | 3.264               | 3.452  | 2.409  | 3.443                | 2.270   | 1.645  |
| (001)  | 3.856               | 3.908  | 3.264  | 3.613                | 2.959   | 2.053  |
